# Supplementary material
Source: Springer Nature journal article supplement (https://www.springermedizin.de/resource/supplementary/12984_2005_44_MOESM10_ESM.pdf/9605190)

**Front and Side Collisions - Course 1**

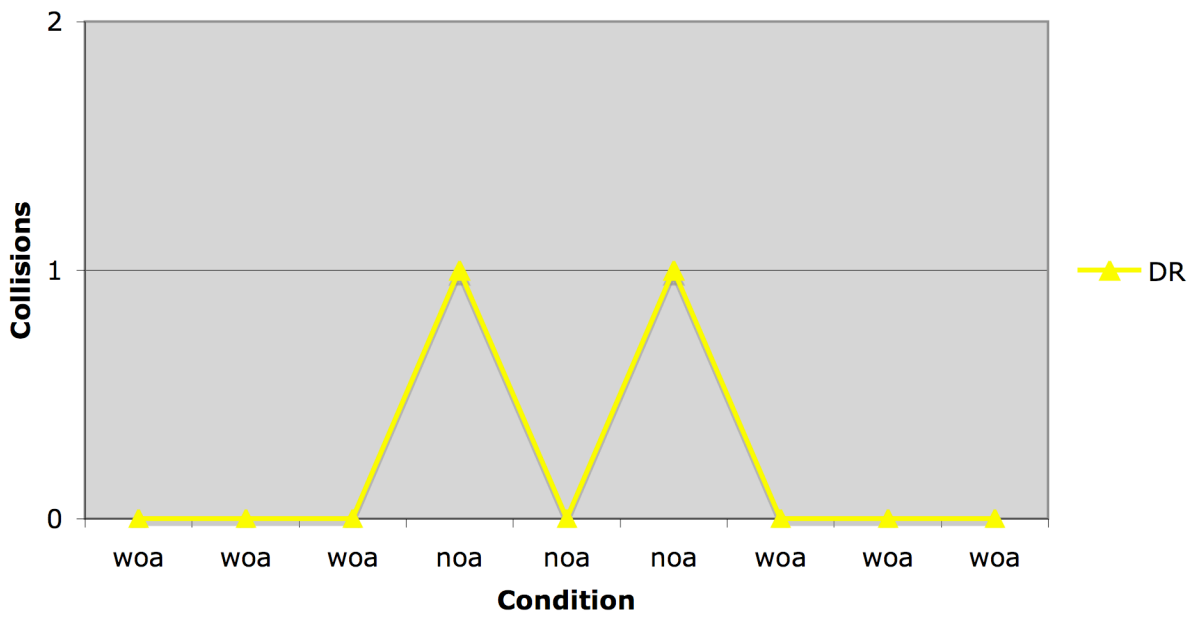

**Front and Side Collisions - Course 2**

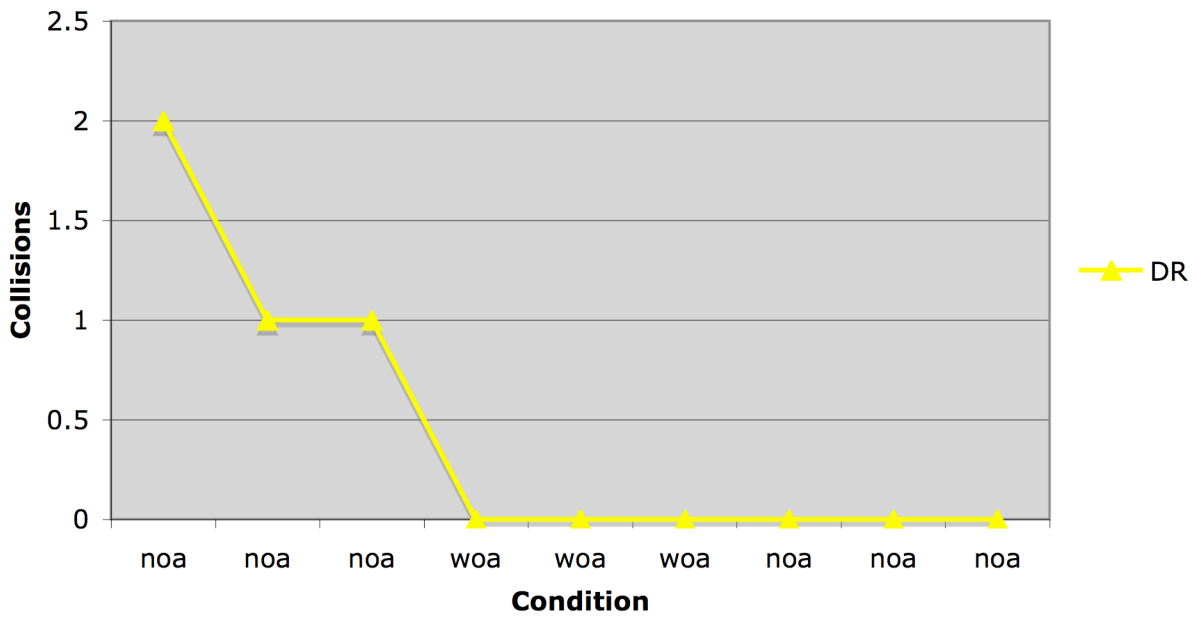

Supplement: MOESM10 [file 9605190]
